# Supplementary material for: Dynamic sampling in autonomous process optimization
Source: Royal Society of Chemistry journal article supplement (doi:10.1039/d3sc06884f), 2024-01-01
Supplement: d3sc06884f1.xlsx [file d3sc06884f1.xlsx]

## Sheet: Sheet1
campaign	Expt	temperature	solvent	reagent	reagent equiv	additive	additive mol%	light stage	t0	t1	t2	t3	t4	t5	t6	t7	t8	t9	t10	t11	t12	Final t (min)	area%1	area%2	area%3	area%4	area%5	area%6	area%7	area%8	area%9	area%10	area%11	area%12	area%13	Final area (%)	Predicted area (%)	Acq function
1	1	20	DMC	DBDMH	1	H2SO4	13	2	0	2	4	6	8									8	0	25.6007	71.1523	60.0968	59.5212									59.5212		Seed
1	2	35	MeCN	NBS	1.125	Water	19	2	0	2	4	6	8	10	12	14	16	18	20	22	24	24	0	2.9306	7.4151	11.4871	15.3979	19.2041	22.8124	26.3205	29.7259	33.0844	36.2931	39.4862	41.7173	41.7173		Seed
1	3	15	DMC	NBS	1.125	HCl	1	5	0	2	4	6	8	10	12	14	16	18	20	22		22	0	16.6018	31.8418	43.8094	52.2455	59.1399	64.4155	68.7556	72.8242	75.5968	77.4967	78.4072		78.4072		Seed
1	4	20	MeCN	DBDMH	1.25	Phosphoric	19	3	0	2	4	6	8	10	12	14	16	18	20			20	0	3.6508	11.4092	23.5	30.5926	36.3718	43.1845	50.2765	52.7964	54.3252	55.0968			55.0968		Seed
1	5	25	DMC	DBDMH	1.375	Phenylphosphonic	25	4	0	2	4	6	8	10	12	14	16	18				18	0	28.0932	46.1963	57.9774	48.6989	42.8525	39.7991	38.4653	36.3242	36.5679				36.5679		Seed
1	6	5	MeCN	NBS	1.25	Acetic	13	4	0	2	4	6	8	10	12	14	16	18	20	22	24	24	0	0.8459	1.7748	3.0915	3.9234	4.6428	5.2298	6.1815	7.4401	8.948	9.6927	10.4139	11.2932	11.2932		Seed
1	7	15	DMC	NBS	1.5	Lactic	7	1	0	2	4	6	8	10	12	14	16					16	0	36.2963	53.4615	66.5085	74.2013	79.8098	82.7701	84.7485	85.6205					85.6205		Seed
1	8	25	MeCN	DBDMH	1.375	Picolinic	7	3	0	2	4	6	8	10	12	14						14	0	2.1683	3.0655	5.6692	9.1334	10.4298	12.6879	12.8867						12.8867		Seed
1	9	15	MeCN	NBS	1.5	HCl	25	1	0	2	4	6	8	10	12							12	0	45.8008	52.3542	59.0135	66.4704	72.9994	72.9582							72.9582	100	LM:pred_f
1	10	10	DMC	DBDMH	1.5	Water	1	1	0	2	4	6	8	10	12	14	16	18	20	22	24	24	0	2.4274	5.9127	8.0188	9.3735	10.8493	12.7033	14.4949	16.0181	17.5438	18.9603	20.3473	21.4649	21.4649	100	LM:pred_f
1	11	20	MeCN	NBS	1	Water	25	5	0	2	4	6	8	10	12	14	16	18	20	22	24	24	0	1.2727	3.2742	5.2177	8.0475	9.3991	10.874	12.6437	14.3774	16.1707	17.9208	19.8699	21.5853	21.5853	99.9448	LM:pred_f
1	12	15	DMC	NBS	1.5	Water	25	3	0	2	4	6	8	10	12	14	16	18	20	22		22	0	8.9786	21.0512	39.5442	49.9881	58.1917	65.4863	71.2249	75.4207	79.2795	81.8465	83.4374		83.4374	100	LM:pred_f
1	13	20	DMC	NBS	1	HCl	25	2	0	2	4	6										6	0	51.8453	54.9722	54.2841										54.2841	96.5217	LM:pred_f
1	14	25	DMC	NBS	1.5	HCl	1	2	0	2	4	6	8	10	12	14	16	18	20	22		22	0	10.3259	24.0645	47.5417	60.0725	65.3395	67.5083	69.6918	73.86	76.8069	78.9374	80.3051		80.3051	91.7255	LM:pred_f
1	15	20	DMC	NBS	1.5	Picolinic	25	1	0	2	4	6	8	10	12	14	16	18	20	22	24	24	0	8.9117	24.0294	34.9278	44.2619	52.9108	60.0308	65.6143	69.3045	73.3261	76.4772	78.4445	80.2705	80.2705	88.1397	LM:pred_f
1	16	20	DMC	NBS	1.5	HCl	1	2	0	2	4	6	8	10	12	14						14	0	37.887	60.2706	71.8371	78.348	79.9635	83.7186	84.6072						84.6072	86.1426	LM:pred_f
1	17	20	DMC	NBS	1.5	HCl	1	1	0	2	4	6	8	10	12	14	16	18	20	22	24	24	0	16.564	28.0066	36.8261	43.7435	51.9592	57.953	62.998	66.8337	69.7085	72.0009	73.6872	75.0416	75.0416	85.6946	LM:pred_f
1	18	20	DMC	NBS	1.5	H2SO4	25	2	0	2	4											4	0	80.5383	79.4053											79.4053	84.3712	LM:pred_f
1	19	20	DMC	NBS	1.5	H2SO4	1	2	0	2	4	6	8	10								10	0	64.9496	84.4908	79.2477	73.5806	72.2978								72.2978	83.767	LM:pred_f
1	20	20	DMC	NBS	1.5	HCl	25	1	0	2	4											4	0	57.1867	56.1078											56.1078	83.8601	LM:pred_f
1	21	20	DMC	NBS	1.5	Lactic	1	2	0	2	4	6	8	10	12							12	0	61.4492	66.0412	69.9994	73.6031	75.9604	75.9604							75.9604	83.3746	LM:pred_f
1	22	15	DMC	DBDMH	1.2375	Water	16	5	0	2	4	6	8	10	12	14	16	18	20	22	24	24	0	5.1601	10.3703	15.6631	19.4647	23.0773	22.2413	24.1232	26.5565	28.3273	25.1936	26.6862	27.7384	27.7384		RS
1	23	10	MeCN	DBDMH	1.3375	HCl	16	5	0	2	4	6	8	10	12	14	16	18				18	0	7.2052	9.7009	10.7313	11.2801	11.613	11.0293	11.2737	10.7601	10.9231				10.9231		RS
1	24	5	MeCN	DBDMH	1.125	Water	10.5	2	0	2	4	6	8	10								10	0	0	0.7523	1.6849	2.2794	2.2603								2.2603		RS
1	25	20	DMC	NBS	1.5	Picolinic	1	2	0	2	4	6	8	10	12	14	16	18	20	22	24	24	0	7.4454	18.781	28.2646	36.2821	43.7941	49.3929	54.6143	59.3702	62.8705	65.5542	67.9721	69.8246	69.8246	81.5133	LM:pred_f
1	26	25	MeCN	NBS	1.5	Water	5.5	5	0	2	4	6	8	10	12	14	16	18	20	22	24	24	0	3.0269	5.1943	7.5735	9.6194	11.9595	14.6926	15.9653	17.8974	19.7197	21.9779	23.3047	25.6599	25.6599		RS
1	27	35	MeCN	DBDMH	1.2875	Water	4	4	0	2	4	6	8	10								10	0	3.5241	6.7517	7.4729	8.0206	8.1656								8.1656		RS
1	28	20	DMC	NBS	1.5	HCl	25	2	0	2	4	6										6	0	46.3951	53.6121	53.8744										53.8744	80.7748	LM:pred_f
1	29	20	DMC	NBS	1.5	Picolinic	1	1	0	2	4	6	8	10	12	14	16	18	20			20	0	8.8079	20.6703	30.1733	37.9784	42.2877	47.5795	51.896	53.3432	55.7303	56.5033			56.5033	80.2541	LM:pred_f
1	30	30	DMC	DBDMH	1.2	Water	22.5	1	0	2	4	6	8	10	12	14	16	18	20	22	24	24	0	3.7984	9.38	13.1426	17.5035	18.119	20.6704	22.9907	24.515	25.7629	31.8794	33.326	34.3064	34.3064		RS
1	31	35	MeCN	NBS	1	HCl	24	5	0	2	4	6										6	0	56.0394	63.4459	63.6386										63.6386		RS
1	32	25	DMC	NBS	1.5	H2SO4	25	1	0	2	4	6										6	0	76.3707	80.8786	81.0233										81.0233	80.5326	LM:pred_f
1	33	5	DMC	NBS	1.025	Acetic	21	2	0	2	4	6	8	10	12	14	16	18	20	22	24	24	0	2.8476	8.1238	13.8944	19.5373	23.936	28.0134	31.5058	35.776	37.4185	40.657	42.6014	44.6026	44.6026		RS
1	34	35	DMC	NBS	1.125	Acetic	10	5	0	2	4	6	8									8	0	32.2779	58.8395	68.1267	66.7998									66.7998		RS
1	35	35	DMC	NBS	1.2	Water	9.5	5	0	2	4	6	8	10	12							12	0	33.1741	52.7643	66.9821	70.9646	67.6505	67.9881							67.9881		RS
1	36	35	MeCN	NBS	1.3	H2SO4	4	4	0	2	4	6										6	0	82.4704	80.7227	80.1052										80.1052		RS
1	37	30	DMC	NBS	1.5	H2SO4	25	2	0	2	4	6										6	0	70.067	79.6156	79.8388										79.8388	82.1705	LM:pred_f
1	38	35	DMC	NBS	1.0125	Phenylphosphonic	8	1	0	2	4	6										6	0	49.6528	75.5385	75.859										75.859		RS
1	39	5	MeCN	NBS	1.075	H2SO4	23	1	0	2	4	6	8	10	12							12	0	47.0762	69.2092	77.6185	82.4539	84.3949	84.8831							84.8831		RS
1	40	30	DMC	NBS	1.5	H2SO4	25	1	0	2	4											4	0	80.762	80.5796											80.5796	83.6437	LM:pred_f
1	41	30	DMC	NBS	1	H2SO4	25	1	0	2	4											4	0	69.1004	70.4834											70.4834	83.3845	LM:pred_f
1	42	30	MeCN	DBDMH	1.075	HCl	8.5	2	0	2	4	6	8	10	12	14	16	18				18	0	4.9632	8.627	8.8302	9.936	10.386	11.3313	11.7497	12.3447	12.4237				12.4237		RS
1	43	35	MeCN	NBS	1.075	Acetic	22	2	0	2	4	6	8	10	12	14	16	18	20	22		22	0	2.4545	5.5588	8.1404	10.195	12.0622	13.3718	14.4259	15.6881	17.3357	17.8617	17.9533		17.9533		RS
1	44	20	DMC	DBDMH	1	Acetic	3.5	5	0	2	4	6	8	10	12	14	16					16	0	7.0763	15.5767	20.2726	23.9315	26.8789	27.7334	28.4127	28.6259					28.6259		RS
1	45	30	DMC	DBDMH	1.375	HCl	5.5	5	0	2	4	6	8	10	12	14	16	18	20	22		22	0	8.0374	16.0978	20.5849	24.8154	28.8538	29.8464	31.7086	32.777	33.6584	27.6734	27.8597		27.8597		RS
1	46	5	DMC	DBDMH	1.425	HCl	25	4	0	2	4	6	8	10								10	0	33.4168	47.3016	55.8226	61.6572	60.4356								60.4356		RS
2	47	20	DMC	DBDMH	1	H2SO4	13	2	0	2	4	6	8	10	12							12	0	38.7122	72.5038	68.0049	56.8147	68.6695	68.575							68.575		Seed
2	48	35	MeCN	NBS	1.125	Water	19	2	0	2	4	6	8	10	12	14	16	18	20	22	24	24	0	3.5064	8.4568	12.4515	16.3205	19.8832	23.2721	26.4353	29.5884	32.9019	35.3545	38.0252	40.2337	40.2337		Seed
2	49	15	DMC	NBS	1.125	HCl	1	5	0	2	4	6	8	10	12	14	16	18	20			20	0	16.719	34.9877	48.0147	57.1319	64.6738	70.3022	74.4883	78.2281	80.1754	81.2263			81.2263		Seed
2	50	20	MeCN	DBDMH	1.25	Phosphoric	19	3	0	2	4	6	8	10	12	14	16	18	20			20	0	13.9568	31.5126	43.9147	51.846	49.9959	51.1708	55.7459	51.9054	53.4095	53.0793			53.0793		Seed
2	51	25	DMC	DBDMH	1.375	Phenylphosphonic	25	4	0	2	4	6	8									8	0	30.229	50.2016	51.4992	51.3103									51.3103		Seed
2	52	5	MeCN	NBS	1.25	Acetic	13	4	0	2	4	6	8	10	12	14	16	18	20	22	24	24	0	0	1.2278	1.8795	2.5351	3.2031	3.8455	4.5666	5.1617	5.8502	6.5325	7.2339	7.2339	7.2339		Seed
2	53	15	DMC	NBS	1.5	Lactic	7	1	0	2	4	6	8	10	12	14	16	18	20	22	24	24	0	6.823	25.5712	36.6281	45.6941	40.9143	58.9163	63.8749	68.1179	71.6223	74.562	76.6603	78.9359	78.9359		Seed
2	54	25	MeCN	DBDMH	1.375	Picolinic	7	3	0	2	4	6	8	10	12	14	16	18	20	22	24	24	0	1.014	5.7852	7.3078	8.6393	12.6457	13.712	12.8754	13.7001	16.687	17.3891	17.9089	15.8665	15.8665		Seed
2	55	15	DMC	NBS	1.1125	HCl	1	5	0	2	4	6	8	10	12	14	16	18	20			20	0	16.8972	30.2995	42.5261	52.5224	60.5563	66.4318	71.0074	74.3461	77.7806	79.1558			79.1558	83.8174	BO:EI
2	56	15	DMC	NBS	1.2125	HCl	1	5	0	2	4	6	8	10	12	14	16	18	20			20	0	18.3018	33.3978	47.3919	57.5792	65.1019	70.596	74.5211	77.8984	79.9317	80.7736			80.7736	86.6282	BO:EI
2	57	15	DMC	NBS	1.3	H2SO4	3.5	3	0	2	4	6	8									8	0	73.1474	81.3231	84.3994	85.3123									85.3123	84.4869	BO:EI
2	58	25	DMC	NBS	1.4875	H2SO4	3	1	0	2	4	6										6	0	83.2286	80.8495	80.9963										80.9963	88.101	BO:EI
2	59	5	DMC	NBS	1.3	HCl	8.5	2	0	2	4	6										6	0	65.7421	68.2514	68.9093										68.9093	88.0492	BO:EI
2	60	35	DMC	NBS	1.2625	H2SO4	1	4	0	2	4	6	8									8	0	53.3934	76.7448	81.5284	82.798									82.798	87.9472	BO:EI
2	61	20	DMC	NBS	1	Picolinic	1	1	0	2	4	6	8	10	12	14	16	18				18	0	16.9564	34.3588	47.9875	57.7501	64.9072	70.0063	73.2336	75.7989	76.4951				76.4951	87.7221	BO:EI
2	62	15	DMC	NBS	1.5	H2SO4	1	5	0	2	4	6	8	10								10	0	75.916	85.6006	83.5656	81.7288	81.1177								81.1177	87.6223	BO:EI
2	63	30	DMC	NBS	1.1875	H2SO4	17	3	0	2	4											4	0	52.2934	52.6533											52.6533	87.2787	BO:EI
2	64	5	DMC	NBS	1.5	H2SO4	1	2	0	2	4	6	8									8	0	54.7952	78.9245	85.9066	85.314									85.314	87.5293	BO:EI
2	65	15	DMC	NBS	1.3625	H2SO4	1	3	0	2	4	6	8									8	0	75.0419	84.8279	82.9295	82.8488									82.8488	87.1957	BO:EI
2	66	5	MeCN	DBDMH	1	H2SO4	25	1	0	2	4	6	8	10	12	14	16					16	0	41.413	56.2555	68.3888	74.5161	78.8529	81.549	84.1545	83.02					83.02	87.2775	BO:EI
2	67	5	MeCN	DBDMH	1	HCl	25	5	0	2	4	6	8	10	12	14						14	0	12.8639	13.6816	13.2374	14.1806	14.6765	15.5626	15.6788						15.6788	87.4494	BO:EI
2	68	5	MeCN	DBDMH	1	Lactic	25	1	0	2	4	6	8	10	12	14	16	18	20	22	24	24	0	3.7712	6.729	10.2171	12.0999	13.6672	13.9758	14.8992	15.7677	16.4966	17.1519	17.7194	18.3038	18.3038	89.382	BO:EI
2	69	5	DMC	NBS	1.4625	H2SO4	8	1	0	2	4	6										6	0	82.8036	84.6324	85.385										85.385	88.5636	BO:EI
2	70	25	MeCN	DBDMH	1	H2SO4	25	1	0	2	4	6	8	10	12							12	0	64.7341	79.0997	77.0079	80.2793	77.2247	77.2036							77.2036	88.15	BO:EI
2	71	5	DMC	NBS	1.4125	Picolinic	5.5	2	0	2	4	6	8	10	12	14	16	18	20	22	24	24	0	4.1657	9.5838	14.514	19.4118	24.0592	29.0608	33.0415	37.2313	40.8672	44.2697	48.234	51.3316	51.3316	88.0787	BO:EI
2	72	10	DMC	NBS	1.275	H2SO4	2	1	0	2	4	6										6	0	74.2229	82.9743	83.5981										83.5981	88.5952	BO:EI
2	73	20	DMC	NBS	1.075	H2SO4	3.5	5	0	2	4											4	0	78.0586	78.3566											78.3566	88.5308	BO:EI
2	74	30	DMC	NBS	1.5	Acetic	6	1	0	2	4	6	8	10								10	0	39.4642	65.7245	78.7281	82.8897	84.265								84.265	88.5932	BO:EI
2	75	25	DMC	NBS	1.5	Acetic	16	1	0	2	4	6	8	10	12							12	0	33.9766	58.2264	70.0922	79.1026	82.7439	84.1696							84.1696	87.9916	BO:EI
2	76	30	DMC	NBS	1.075	Acetic	10	1	0	2	4	6	8									8	0	39.5427	63.4236	74.5112	75.3458									75.3458	87.8448	BO:EI
2	77	5	MeCN	DBDMH	1.5	H2SO4	25	1	0	2	4	6	8	10								10	0	37.0281	55.8605	63.1048	66.3081	67.4109								67.4109	87.7899	BO:EI
2	78	35	DMC	NBS	1.4	HCl	1	5	0	2	4	6	8									8	0	46.5099	74.3677	81.9764	83.503									83.503	87.7047	BO:EI
2	79	35	DMC	NBS	1.0125	HCl	1	3	0	2	4	6	8	10								10	0	27.3528	48.2092	60.7778	66.5596	67.2448								67.2448	87.6846	BO:EI
2	80	35	DMC	NBS	1.5	H2SO4	4	5	0	2	4											4	0	79.3202	80.8592											80.8592	87.5338	BO:EI
3	81	20	DMC	DBDMH	1	H2SO4	13	2	0	2	4	6	8									8	0	42.0029	73.9985	82.1603	81.3025									81.3025		Seed
3	82	35	MeCN	NBS	1.125	Water	19	2	0	2	4	6	8	10	12	14	16	18	20	22	24	24	0	3.3565	6.6352	9.8471	13.2338	16.857	20.2032	23.7549	26.9472	30.6414	33.7974	37.5346	40.5682	40.5682		Seed
3	83	15	DMC	NBS	1.125	HCl	1	5	0	2	4	6	8	10	12	14	16	18	20			20	0	16.5669	29.7801	43.5694	54.8804	62.386	68.3791	73.3371	76.4267	78.9125	79.6558			79.6558		Seed
3	84	20	MeCN	DBDMH	1.25	Phosphoric	19	3	0	2	4	6	8	10	12	14	16	18				18	0	17.9634	37.6771	52.1489	62.1494	67.733	71.309	74.1691	77.4145	78.2871				78.2871		Seed
3	85	25	DMC	DBDMH	1.375	Phenylphosphonic	25	4	0	2	4	6										6	0	43.621	58.0785	59.1626										59.1626		Seed
3	86	5	MeCN	NBS	1.25	Acetic	13	4	0	2	4	6	8	10	12	14	16	18	20	22	24	24	0	1.4639	2.7141	3.6789	4.5168	5.3252	6.1254	6.8294	7.5681	8.31	9.0429	9.8081	10.5497	10.5497		Seed
3	87	15	DMC	NBS	1.5	Lactic	7	1	0	2	4	6	8	10	12	14						14	0	37.6254	55.8668	68.5385	76.4252	80.9618	83.1058	84.7807						84.7807		Seed
3	88	25	MeCN	DBDMH	1.375	Picolinic	7	3	0	2	4	6	8	10	12	14						14	0	2.4084	5.338	8.5237	11.2763	13.2153	15.2478	15.4299						15.4299		Seed
3	89	15	DMC	NBS	1.4875	Lactic	7	1	0	2	4	6	8	10	12	14	16	18				18	0	30.6154	47.0984	59.3464	67.4562	73.4278	77.5194	80.4707	82.5844	83.9325				83.9325	87.1747	BO:EI
3	90	10	DMC	DBDMH	1.375	Water	9.5	5	0	2	4	6	8	10	12	14	16	18	20	22	24	24	0	3.8872	7.2725	11.4215	14.9358	18.6529	21.4025	24.0728	27.078	29.8654	32.5144	35.2109	37.6468	37.6468		RS
3	91	20	DMC	NBS	1.5	Acetic	5.5	2	0	2	4	6	8	10	12	14	16	18	20	22	24	24	0	9.5669	22.2517	34.5127	44.3869	52.1943	59.3289	65.1231	69.8025	73.6028	76.5194	78.7193	80.7726	80.7726	96.3927	BO:UCB
3	92	20	DMC	NBS	1.5	Acetic	11	1	0	2	4	6	8	10	12	14	16	18	20			20	0	10.7194	26.7948	43.8573	56.3378	65.6634	72.6698	76.8218	81.0956	83.4334	84.6654			84.6654	87.4196	BO:EI
3	93	15	DMC	NBS	1.5	Lactic	8.5	1	0	2	4	6	8	10	12	14	16	18	20			20	0	29.1294	46.1496	58.0044	66.6341	72.4098	77.1241	79.9975	82.0258	83.8201	84.8687			84.8687	53.9113	BO:PI
3	94	10	MeCN	DBDMH	1	Lactic	25	2	0	2	4	6	8	10	12	14	16	18	20	22	24	24	0	1.8632	4.4421	7.4449	9.3874	11.46	13.6537	15.0987	16.5596	17.4173	18.803	19.4075	20.381	20.381	97.616	BO:UCB
3	95	25	DMC	NBS	1.5	Phosphoric	8	1	0	2	4	6	8									8	0	65.4562	82.3077	80.0863	79.6207									79.6207	87.6941	BO:EI
3	96	20	DMC	NBS	1.5	Acetic	9.5	1	0	2	4	6	8	10	12	14	16	18	20	22	24	24	0	11.4543	27.2213	41.5006	53.3123	61.3072	68.0032	72.8962	76.728	79.5262	81.3087	83.017	83.9332	83.9332	56.938	BO:PI
3	97	30	MeCN	DBDMH	1.425	Phenylphosphonic	25	4	0	2	4	6	8	10	12	14	16	18				18	0	7.4465	11.3783	14.5003	17.6088	19.8044	21.6556	23.1436	24.3895	24.8471				24.8471	97.5407	BO:UCB
3	98	20	DMC	NBS	1.5	Lactic	16	2	0	2	4	6	8	10	12	14						14	0	36.1877	52.8187	65.3908	70.6516	76.1114	78.9288	79.8139						79.8139	87.6138	BO:EI
3	99	20	DMC	NBS	1.5	Acetic	12.5	1	0	2	4	6	8	10	12	14	16	18	20	22	24	24	0	10.1861	23.6233	36.6104	47.2552	55.0238	61.4041	66.744	70.6246	74.0966	76.6151	78.9618	79.9253	79.9253	56.3322	BO:PI
3	100	15	DMC	NBS	1.5	Picolinic	10.5	3	0	2	4	6	8	10	12	14	16	18	20	22	24	24	0	12.7191	24.7184	35.6809	44.4947	52.7615	58.7785	63.4705	68.0505	71.6859	74.2632	76.7798	79.0037	79.0037	96.6941	BO:UCB
3	101	20	DMC	NBS	1.2625	Lactic	10.5	2	0	2	4	6	8	10	12	14						14	0	37.583	55.449	67.7146	73.4148	78.5329	80.8027	80.8354						80.8354	87.4919	BO:EI
3	102	20	DMC	NBS	1.5	Lactic	10	2	0	2	4	6	8	10	12	14	16					16	0	31.7899	51.1318	63.9357	74.5015	78.9141	81.8566	83.8076	84.062					84.062	52.7449	BO:PI
3	103	5	MeCN	DBDMH	1.35	Picolinic	18	4	0	2	4	6	8	10	12	14	16	18	20	22	24	24	0	0	1.5972	4.4276	5.626	6.8888	8.5232	9.4381	10.3419	11.0846	11.7363	12.3935	12.9872	12.9872	96.9985	BO:UCB
3	104	25	MeCN	DBDMH	1.1125	Picolinic	19	2	0	2	4	6	8	10	12	14	16	18	20	22	24	24	0	1.1337	4.6456	8.1445	10.3767	12.0648	13.7137	15.0892	16.4055	17.2279	18.1389	18.9292	19.1876	19.1876	88.2127	BO:EI
3	105	20	DMC	NBS	1.5	Lactic	9	1	0	2	4	6	8	10	12	14	16	18				18	0	22.7714	38.4321	51.9563	60.094	65.666	69.7443	73.0186	77.9761	78.9544				78.9544	55.241	BO:PI
3	106	5	DMC	NBS	1.5	Acetic	9	2	0	2	4	6	8	10	12	14	16	18	20	22	24	24	0	4.7595	9.682	15.0014	20.0599	25.2497	29.6834	33.8916	38.7906	42.1991	45.6532	48.3875	50.8083	50.8083	98.0331	BO:UCB
3	107	25	DMC	NBS	1.4375	Picolinic	9.5	2	0	2	4	6	8	10	12	14	16	18	20	22		22	0	10.6905	25.1651	37.901	46.514	59.0926	65.9859	71.3398	75.4802	78.5248	80.4581	81.8725		81.8725	88.3505	BO:EI
3	108	15	DMC	NBS	1.5	Acetic	9	1	0	2	4	6	8	10	12	14	16	18	20	22	24	24	0	6.89	16.1639	24.7703	33.9256	41.7957	48.5972	55.305	58.5344	64.103	65.715	70.5949	73.0931	73.0931	77.4867	BO:PI
3	109	35	DMC	NBS	1.5	HCl	25	1	0	2	4	6										6	0	38.5412	40.6906	40.6998										40.6998	98.3778	BO:UCB
3	110	35	DMC	NBS	1	Phenylphosphonic	1	1	0	2	4	6	8	10	12							12	0	25.3897	45.9228	58.5772	65.4548	68.0353	68.5457							68.5457	88.8788	BO:EI
3	111	30	DMC	NBS	1.5	Phosphoric	2	1	0	2	4	6	8									8	0	68.0385	84.1545	80.8073	80.133									80.133	38.445	BO:PI
3	112	5	DMC	DBDMH	1	HCl	1	1	0	2	4	6	8	10	12	14	16	18	20	22	24	24	0	2.0524	3.9147	5.9832	7.6927	9.5061	10.9142	12.6882	13.6908	15.5219	17.1086	18.1153	19.6846	19.6846	95.8827	BO:UCB
3	113	15	DMC	NBS	1.4625	Phenylphosphonic	4	1	0	2	4	6	8	10	12	14	16					16	0	32.5316	62.786	79.9042	85.5035	83.1759	81.2659	78.5241	79.2415					79.2415	89.2498	BO:EI
3	114	20	DMC	NBS	1.4625	Phosphoric	9	2	0	2	4	6	8	10	12	14						14	0	2.005	21.2457	57.0648	73.4082	80.2874	82.6544	81.7953						81.7953	48.9055	BO:PI
3	115	20	MeCN	DBDMH	1.3875	Acetic	17.5	3	0	2	4	6	8	10	12	14	16	18	20	22	24	24	0	1.6437	3.5404	5.9779	7.9729	10.2195	9.2575	10.064	11.0427	11.6923	12.294	12.8111	13.6341	13.6341	97.387	BO:UCB
3	116	35	DMC	NBS	1.5	Acetic	9	1	0	2	4	6	8	10	12							12	0	30.8024	50.9806	63.6951	69.0791	70.9393	71.3734							71.3734	87.5617	BO:EI
3	117	25	DMC	NBS	1.5	Phosphoric	7	1	0	2	4	6										6	0	75.0304	73.4288	72.8344										72.8344	34.3273	BO:PI
3	118	35	DMC	NBS	1.5	H2SO4	1	5	0	2	4	6	8	10								10	0	58.3033	76.6375	79.5241	76.1543	75.4343								75.4343	95.6405	BO:UCB
3	119	30	DMC	NBS	1.5	Lactic	6.5	1	0	2	4	6	8									8	0	56.4693	71.1181	74.8744	75.6271									75.6271	86.7169	BO:EI
3	120	25	DMC	NBS	1.5	Lactic	8	1	0	2	4	6	8	10								10	0	46.7977	65.8221	74.0296	77.433	78.8184								78.8184	30.7196	BO:PI
3	121	35	DMC	NBS	1	Acetic	25	1	0	2	4	6	8									8	0	47.6929	63.9345	66.9495	66.8443									66.8443	94.8782	BO:UCB
3	122	25	DMC	NBS	1.5	Lactic	1	1	0	2	4	6	8	10								10	0	31.6537	50.1677	63.9229	70.2049	71.6308								71.6308	86.5061	BO:EI
3	123	20	DMC	NBS	1.5	Phosphoric	9	1	0	2	4	6										6	0	78.4089	62.6169	61.4172										61.4172	28.5062	BO:PI
3	124	35	DMC	NBS	1	Picolinic	1	5	0	2	4	6										6	0	40.236	58.0641	59.1363										59.1363	94.635	BO:UCB
3	125	25	DMC	NBS	1.5	Lactic	9	1	0	2	4	6	8									8	0	57.5971	73.1709	76.1506	75.6377									75.6377	86.2607	BO:EI
3	126	25	DMC	NBS	1.5	Lactic	8.5	1	0	2	4	6	8									8	0	52.7281	70.654	78.1446	78.9659									78.9659	26.256	BO:PI
3	127	35	DMC	NBS	1.5	Water	1	1	0	2	4	6	8									8	0	37.9277	56.4492	63.2044	64.3797									64.3797	94.1969	BO:UCB
3	128	25	DMC	NBS	1.5	Lactic	9.5	1	0	2	4	6	8	10	12							12	0	55.2907	69.3084	74.6813	76.3468	79.2616	77.7987							77.7987	86.1289	BO:EI
